# Supplementary material for: Structure determination and characterization of two rare-earth molybdenum borate compounds: LnMoBO6 (Ln = La, Ce)
Source: Royal Society of Chemistry journal article supplement (doi:10.1039/b803062f), 2008-01-01
Supplement: b803062f.pdf [file b803062f.pdf]

Table S1. Atomic coordinates and equivalent isotropic displacement parameters for  $\text{LnMoBO}_6$  (Ln=La,Ce)

| Atom                      | Site | x          | y            | z           | $U_{\text{eq}}^{\text{a}}$ |
|---------------------------|------|------------|--------------|-------------|----------------------------|
| <b>LaMoBO<sub>6</sub></b> |      |            |              |             |                            |
| La1                       | 4e   | 0.16948(6) | 0.71951(12)  | -0.01458(2) | 0.0090(2)                  |
| La2                       | 4e   | 0.33106(6) | 0.24650(11)  | 0.26419(2)  | 0.0091(2)                  |
| Mo1                       | 4e   | 0.03429(9) | 0.19089(18)  | 0.33940(4)  | 0.0083(3)                  |
| Mo2                       | 4e   | 0.46656(8) | -0.33058(19) | 0.41015(3)  | 0.0078(3)                  |
| O1                        | 4e   | 0.4082(7)  | 0.7670(13)   | 0.2073(3)   | 0.0108(14)                 |
| O2                        | 4e   | 0.3996(8)  | -0.2416(13)  | 0.3278(3)   | 0.0129(15)                 |
| O3                        | 4e   | 0.0894(7)  | 1.2675(13)   | 0.0426(3)   | 0.0119(14)                 |
| O4                        | 4e   | 0.1022(7)  | 0.2799(13)   | 0.4222(3)   | 0.0116(15)                 |
| O5                        | 4e   | 0.2297(7)  | 0.8401(13)   | 0.1001(3)   | 0.0108(13)                 |
| O6                        | 4e   | -0.1496(7) | 0.2828(14)   | 0.2912(3)   | 0.0160(15)                 |
| O7                        | 4e   | 0.3500(8)  | 0.7469(14)   | -0.0558(3)  | 0.0176(16)                 |
| O8                        | 4e   | 0.6516(7)  | -0.2418(14)  | 0.4590(3)   | 0.0143(15)                 |
| O9                        | 4e   | 0.4699(9)  | -0.7480(14)  | 0.4030(4)   | 0.0214(17)                 |
| O10                       | 4e   | 0.1506(8)  | 0.2753(14)   | 0.3058(3)   | 0.0162(15)                 |
| O11                       | 4e   | 0.0320(8)  | -0.2256(14)  | 0.3463(4)   | 0.0202(17)                 |
| O12                       | 4e   | 0.2681(6)  | 0.3386(14)   | 0.1487(3)   | 0.0118(13)                 |
| B1                        | 4e   | 0.3051(11) | 0.666(2)     | 0.1540(5)   | 0.011(2)                   |
| B2                        | 4e   | 0.193(1)   | 1.166(2)     | 0.0952(4)   | 0.0080(18)                 |
| <b>CeMoBO<sub>6</sub></b> |      |            |              |             |                            |
| Ce1                       | 4e   | 0.19653(3) | 0.28091(7)   | 0.52922(2)  | 0.00677(15)                |
| Mo1                       | 4e   | 0.35455(5) | 0.68761(10)  | 0.81901(4)  | 0.00573(16)                |
| O1                        | 4e   | -0.0044(4) | 0.2691(6)    | 0.5852(3)   | 0.0074(7)                  |
| O2                        | 4e   | 0.2586(4)  | 0.7779(7)    | 0.6528(3)   | 0.0100(8)                  |
| O3                        | 4e   | 0.4604(5)  | 0.2674(7)    | 0.6094(4)   | 0.0152(8)                  |
| O4                        | 4e   | 0.2654(4)  | 0.7264(7)    | 0.4144(3)   | 0.0133(8)                  |
| O5                        | 4e   | 0.3382(5)  | 0.2684(8)    | 0.8036(4)   | 0.0181(9)                  |
| O6                        | 4e   | -0.0305(4) | -0.1603(7)   | 0.7002(3)   | 0.0091(7)                  |
| B1                        | 4e   | -0.0041(6) | 0.1664(11)   | 0.6910(5)   | 0.0087(10)                 |

<sup>a</sup>  $U_{\text{eq}}$  is defined as one third of the trace of the orthogonalized  $U_{ij}$  tensor.

Table S2. Selected bond distances (Å) and angles (°) for LnMoBO<sub>6</sub> (Ln=La,Ce)

| LaMoBO <sub>6</sub>                   |            |                                          |            |                                       |           |
|---------------------------------------|------------|------------------------------------------|------------|---------------------------------------|-----------|
| La1—O7                                | 2.450(7)   | La2—O2                                   | 2.457(7)   | Mo1—O10                               | 1.739(7)  |
| La1—O3 <sup>i</sup>                   | 2.455(7)   | La2—O10                                  | 2.472(7)   | Mo1—O11                               | 1.743(6)  |
| La1—O4 <sup>ii</sup>                  | 2.486(6)   | La2—O1 <sup>vii</sup>                    | 2.535(6)   | Mo1—O6                                | 1.784(7)  |
| La1—O4 <sup>iii</sup>                 | 2.491(6)   | La2—O2 <sup>viii</sup>                   | 2.576(6)   | Mo1—O4                                | 1.830(7)  |
| La1—O5                                | 2.582(6)   | La2—O12                                  | 2.617(6)   | Mo1—O11 <sup>viii</sup>               | 2.436(6)  |
| La1—O8 <sup>iv</sup>                  | 2.598(6)   | La2—O6 <sup>ix</sup>                     | 2.717(6)   | Mo2—O7 <sup>xi</sup>                  | 1.746(8)  |
| La1—O3 <sup>v</sup>                   | 2.655(6)   | La2—O1 <sup>v</sup>                      | 2.845(6)   | Mo2—O9                                | 1.748(6)  |
| La1—O8 <sup>vi</sup>                  | 2.844(6)   | La2—O1                                   | 2.847(6)   | Mo2—O8                                | 1.797(7)  |
| La1—O3                                | 2.952(6)   | La2—O6 <sup>x</sup>                      | 2.993(8)   | Mo2—O2                                | 1.820(7)  |
| La1—O11 <sup>ii</sup>                 | 2.999(8)   | La2—O9 <sup>viii</sup>                   | 2.457(7)   | Mo2—O9 <sup>viii</sup>                | 2.433(6)  |
| B1—O1                                 | 1.327(12)  | B1—O5                                    | 1.388(11)  | B1—O12                                | 1.408(11) |
| B2—O3                                 | 1.319(11)  | B2—O5                                    | 1.401(11)  | B2—O12 <sup>viii</sup>                | 1.377(11) |
| O10—Mo1—O11                           | 106.5(3)   | O4—Mo1—O11 <sup>viii</sup>               | 74.6(3)    | O8—Mo2—O9 <sup>viii</sup>             | 78.3(3)   |
| O10—Mo1—O6                            | 114.1(3)   | O7 <sup>xi</sup> —Mo2—O9                 | 106.8(3)   | O2—Mo2—O9 <sup>viii</sup>             | 74.4(3)   |
| O11—Mo1—O6                            | 102.8(3)   | O7 <sup>xi</sup> —Mo2—O8                 | 114.0(3)   | O1—B1—O5                              | 128.6(8)  |
| O10—Mo1—O4                            | 115.9(3)   | O9—Mo2—O8                                | 102.0(3)   | O1—B1—O12                             | 117.9(8)  |
| O11—Mo1—O4                            | 96.5(3)    | O7 <sup>xi</sup> —Mo2—O2                 | 116.3(3)   | O5—B1—O12                             | 113.5(8)  |
| O6—Mo1—O4                             | 117.5(3)   | O9—Mo2—O2                                | 96.4(3)    | O3—B2—O12 <sup>viii</sup>             | 128.2(8)  |
| O10—Mo1—O11 <sup>viii</sup>           | 81.8(3)    | O8—Mo2—O2                                | 117.7(3)   | O3—B2—O5                              | 117.9(8)  |
| O11—Mo1—O11 <sup>viii</sup>           | 170.1(4)   | O7 <sup>xi</sup> —Mo2—O9 <sup>viii</sup> | 82.3(3)    | O12 <sup>viii</sup> —B2—O5            | 113.8(7)  |
| O6—Mo1—O11 <sup>viii</sup>            | 78.0(3)    | O9—Mo2—O9 <sup>viii</sup>                | 169.5(4)   |                                       |           |
| CeMoBO <sub>6</sub>                   |            |                                          |            |                                       |           |
| Ce1—O1                                | 2.427(4)   | Ce1—O1 <sup>iii</sup>                    | 2.619(3)   | Mo1—O4 <sup>v</sup>                   | 1.780(4)  |
| Ce1—O3                                | 2.438(4)   | Ce1—O4 <sup>i</sup>                      | 2.918(3)   | Mo1—O2                                | 1.823(4)  |
| Ce1—O2                                | 2.450(3)   | Ce1—O1 <sup>ii</sup>                     | 2.929(3)   | Mo1—O5 <sup>vi</sup>                  | 2.417(3)  |
| Ce1—O2 <sup>i</sup>                   | 2.472(3)   | Ce1—O5                                   | 2.939(4)   | B1—O1                                 | 1.330(6)  |
| Ce1—O6 <sup>ii</sup>                  | 2.556(3)   | Mo1—O3 <sup>iv</sup>                     | 1.734(4)   | B1—O6 <sup>x</sup>                    | 1.386(6)  |
| Ce1—O4                                | 2.577(3)   | Mo1—O5                                   | 1.750(3)   | B1—O6                                 | 1.396(5)  |
| O3 <sup>iv</sup> —Mo1—O5              | 105.98(18) | O5—Mo1—O2                                | 96.25(17)  | O4 <sup>v</sup> —Mo1—O5 <sup>vi</sup> | 79.10(14) |
| O3 <sup>iv</sup> —Mo1—O4 <sup>v</sup> | 113.81(19) | O4 <sup>v</sup> —Mo1—O2                  | 118.12(17) | O2—Mo1—O5 <sup>vi</sup>               | 74.10(13) |
| O5—Mo1—O4 <sup>v</sup>                | 102.37(18) | O3 <sup>iv</sup> —Mo1—O5 <sup>vi</sup>   | 82.60(15)  | O1—B1—O6 <sup>x</sup>                 | 127.9(4)  |
| O3 <sup>iv</sup> —Mo1—O2              | 116.47(18) | O5—Mo1—O5 <sup>vi</sup>                  | 169.4(2)   | O1—B1—O6                              | 117.8(4)  |
| O6 <sup>x</sup> —B1—O6                | 114.1(4)   |                                          |            |                                       |           |

Symmetry codes: LaMoBO<sub>6</sub>: (i) -x, 2-y, -z; (ii) x, 0.5-y, -0.5+z; (iii) x, 1.5-y, -0.5+z; (iv) 1-x, 0.5+y, 0.5-z;

---

(v)  $x, -1+y, z$ ; (vi)  $1-x, 1.5+y, 0.5-z$ ; (vii)  $1-x, -0.5+y, 0.5-z$ ; (viii)  $x, 1+y, z$ ; (ix)  $-x, -0.5+y, 0.5-z$ ; (x)  $-x, 0.5+y, 0.5-z$ ; (xi)  $x, 0.5-y, 0.5+z$ ; (xii)  $x, 1.5-y, 0.5+z$ ; (xiii)  $1-x, -1.5+y, 0.5-z$ .

CeMoBO<sub>6</sub>: (i)  $x, -1+y, z$ ; (ii)  $-x, -y, 1-z$ ; (iii)  $-x, 1-y, 1-z$ ; (iv)  $1-x, 0.5+y, 1.5-z$ ; (v)  $x, 1.5-y, 0.5+z$ ; (vi)  $x, 1+y, z$ ; (vii)  $1-x, -0.5+y, 1.5-z$ ; (viii)  $x, 1.5-y, -0.5+z$ ; (ix)  $-x, -0.5+y, 1.5-z$ ; (x)  $-x, 0.5+y, 1.5-z$ .

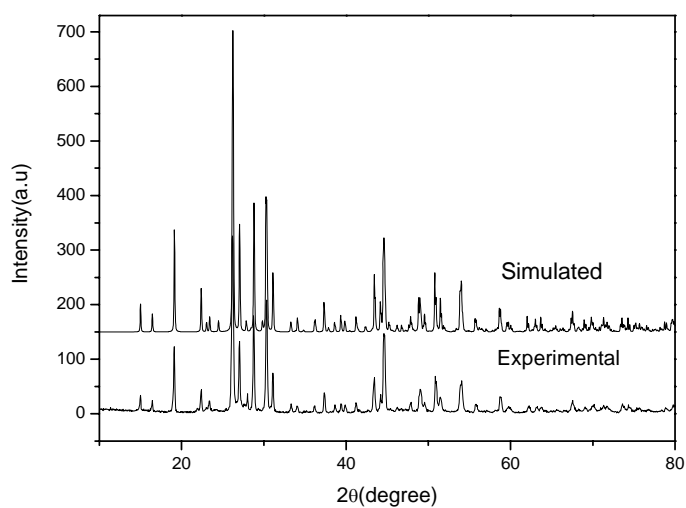

Figure S1. Experimental and simulated X-ray powder diffraction patterns of LaMoBO<sub>6</sub>

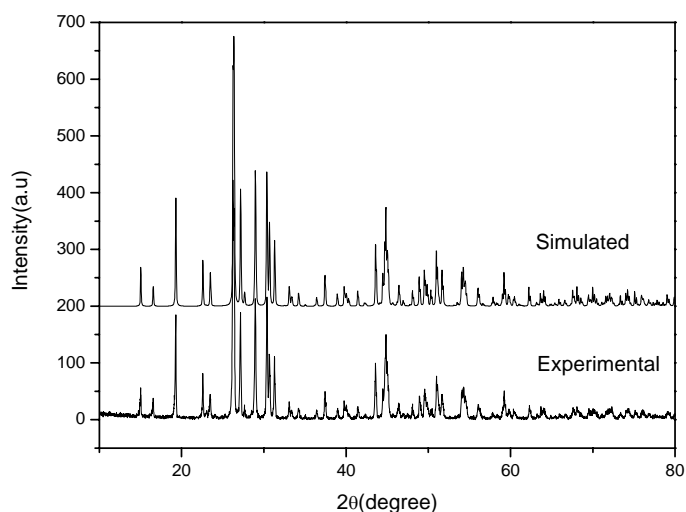

Figure S2. Experimental and simulated X-ray powder diffraction patterns of CeMoBO<sub>6</sub>

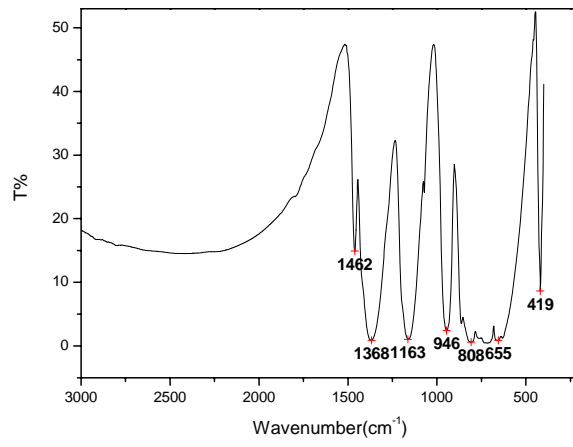

Figure S3. The IR spectrum of LaMoBO<sub>6</sub>

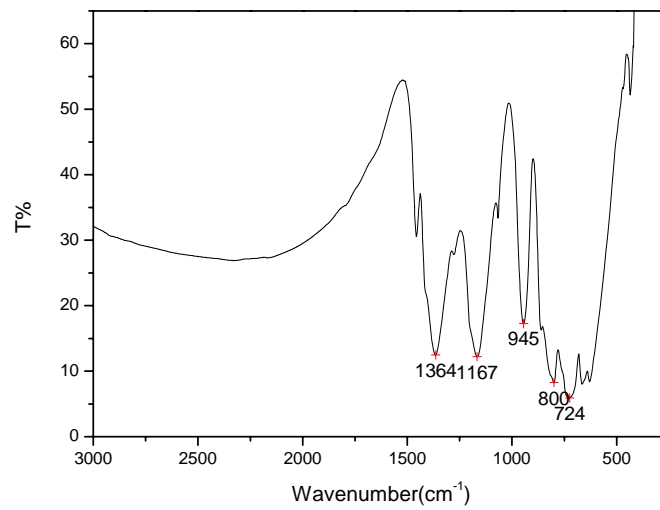

Figure S4. The IR spectrum of CeMoBO<sub>6</sub>

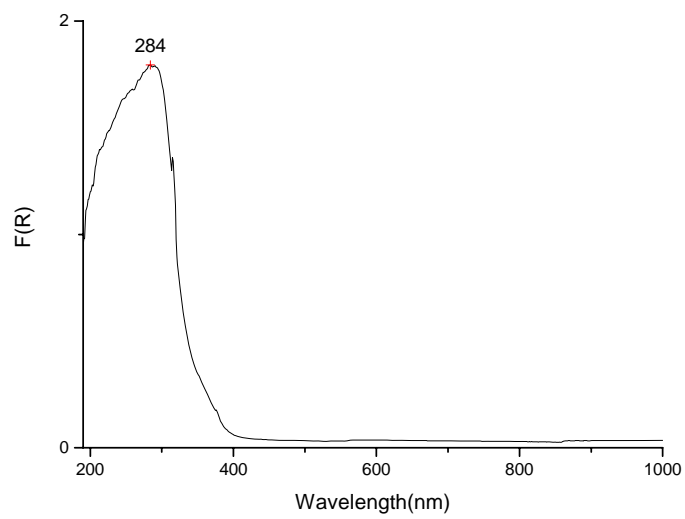

Figure S5. The absorption spectra of compounds  $\text{LaMoBO}_6$

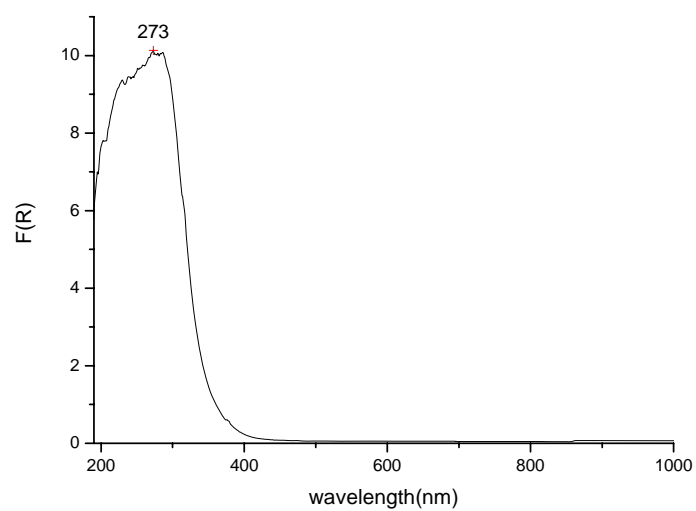

(b)

Figure S6. The absorption spectra of compounds  $\text{CeMoBO}_6$

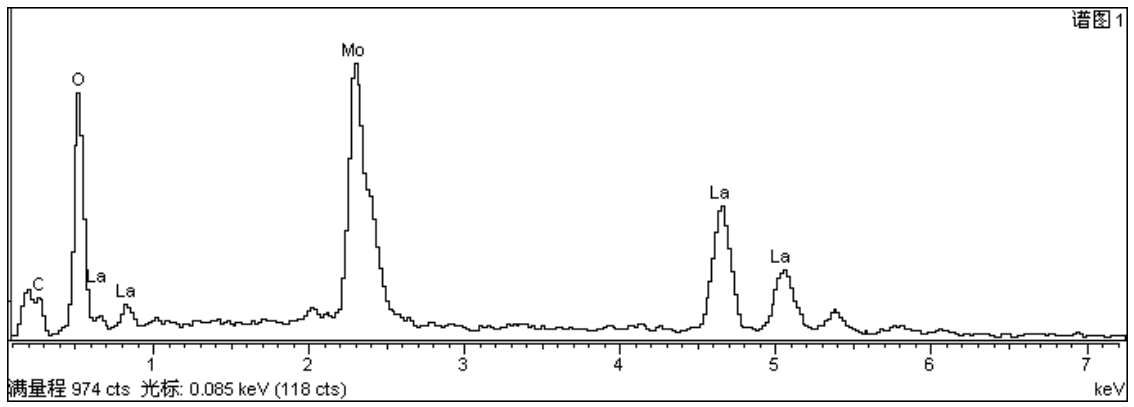

Figure S7. Full results of elemental analysis for LaMoBO<sub>6</sub>

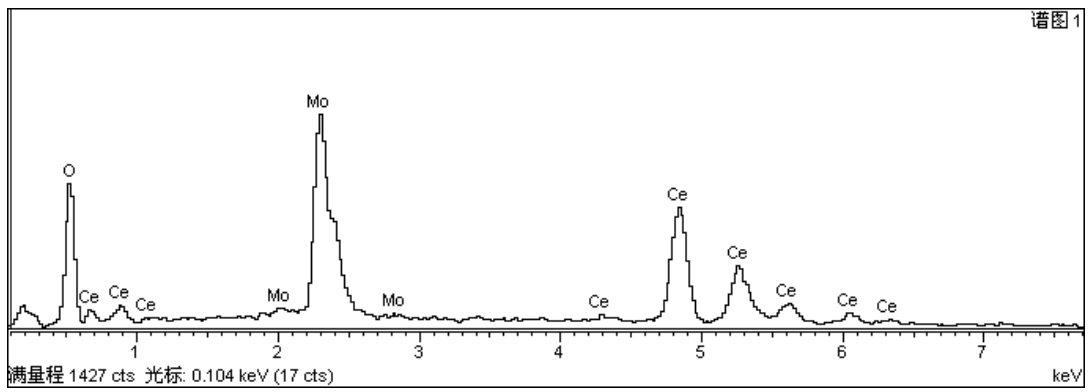

Figure S8. Full results of elemental analysis for CeMoBO<sub>6</sub>
